# Supplementary material for: Facile synthesis of nitrogen and sulfur dual-doped graphitized carbon microspheres and their high performance in the oxygen reduction reaction
Source: Royal Society of Chemistry journal article supplement (doi:10.1039/c6ra02193j), 2016-01-01
Supplement: c6ra02193j1.pdf [file c6ra02193j1.pdf]

## Supporting Information

### Facile Synthesis of Nitrogen and Sulfur Dual-doped Graphitized carbon Microspheres and Its High Performance for Oxygen Reduction Reaction

Gengnan Li, Binghan Wu, Liang Li\*

Key Laboratory for Ultrafine Materials of Ministry of Education, School of Materials

Science and Engineering, East China University of Science and Technology,

Shanghai 200237, China

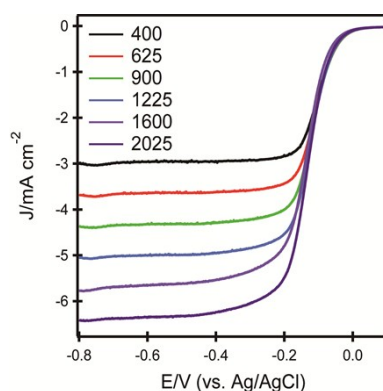

**Fig. S1** Linear sweep curves of Pt/C on rotating disk electrode at various rotation speeds. (Scan speed: 5 mV s<sup>-1</sup>)

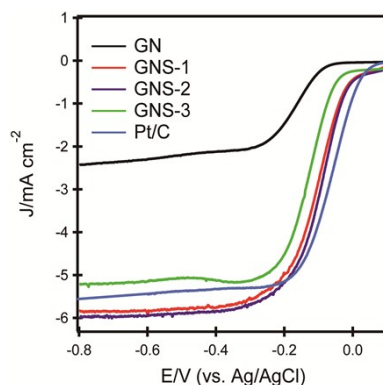

**Fig. S2** Liner sweep curves of different catalysts on rotating disk electrode at 1600 rpm. (Scan speed: 5 mV s<sup>-1</sup>)

**Table S1** The position and XPS fitting parameters of N element

| sample      | C-C                 |                     | C-N                 |                     | C-O                 |                     | C=O                 |                     | -O-C=O              |                     |
|-------------|---------------------|---------------------|---------------------|---------------------|---------------------|---------------------|---------------------|---------------------|---------------------|---------------------|
|             | Binding energy (eV) | FWHM fit param (eV) | Binding energy (eV) | FWHM fit param (eV) | Binding energy (eV) | FWHM fit param (eV) | Binding energy (eV) | FWHM fit param (eV) | Binding energy (eV) | FWHM fit param (eV) |
| <b>GR</b>   | 284.6               | 1.02                | 285.5               | 1.16                | 286.7               | 1.16                | 287.9               | 1.16                | 289.3               | 1.07                |
| <b>GS-1</b> | 284.6               | 1.20                | 285.7               | 1.12                | 286.7               | 1.12                | 287.9               | 1.27                | 289.4               | 1.29                |
| <b>GS-2</b> | 284.6               | 1.19                | 285.7               | 1.06                | 286.8               | 1.06                | 287.8               | 1.29                | 289.4               | 1.20                |
| <b>GS-3</b> | 284.6               | 1.16                | 285.8               | 1.16                | 286.7               | 1.11                | 287.9               | 1.28                | 289.4               | 1.11                |

**Table S2** The position and XPS fitting parameters of N element

| sample      | Pyridinic N         |                     | Pyrrolic N          |                     | Quaternary N        |                     |
|-------------|---------------------|---------------------|---------------------|---------------------|---------------------|---------------------|
|             | Binding energy (eV) | FWHM fit param (eV) | Binding energy (eV) | FWHM fit param (eV) | Binding energy (eV) | FWHM fit param (eV) |
| <b>GR</b>   | 398.3               | 1.55                | 400.4               | 1.61                | 401.5               | 1.62                |
| <b>GS-1</b> | 398.3               | 1.84                | 400.4               | 1.68                | 401.6               | 1.42                |
| <b>GS-2</b> | 398.3               | 1.59                | 400.5               | 1.67                | 401.6               | 1.67                |
| <b>GS-3</b> | 398.2               | 1.64                | 400.5               | 1.77                | 401.5               | 1.72                |

**Table S3** The position and XPS fitting parameters of S element

| sample      | S 2p <sub>3/2</sub> |                     | S 2p <sub>1/2</sub> |                     | -SO <sub>n</sub> -  |                     |
|-------------|---------------------|---------------------|---------------------|---------------------|---------------------|---------------------|
|             | Binding energy (eV) | FWHM fit param (eV) | Binding energy (eV) | FWHM fit param (eV) | Binding energy (eV) | FWHM fit param (eV) |
| <b>GR</b>   | -                   | -                   | -                   | -                   | -                   | -                   |
| <b>GS-1</b> | 163.8               | 0.90                | 164.9               | 1.15                | 168.1               | 2.38                |
| <b>GS-2</b> | 163.8               | 0.88                | 164.9               | 0.98                | 168.0               | 2.37                |
| <b>GS-3</b> | 163.8               | 1.01                | 164.9               | 1.15                | 168.2               | 2.08                |
